# Supplementary material
Source: PubMed Central journal article supplement (PMC8338907)
Supplement: NIHMS1721760-supplement-1.pdf [file NIHMS1721760-supplement-1.pdf]

## Online Supplemental material

Supplement to: Yoriko Heianza, Tao Zhou, Dianjianyi Sun, Frank B. Hu, Lu Qi.

Healthful Plant-Based Dietary Patterns, Genetic Risk of Obesity, and Cardiovascular Risk in the UK Biobank Study

|           |                                                                                                                                                                                                                                                                                               |
|-----------|-----------------------------------------------------------------------------------------------------------------------------------------------------------------------------------------------------------------------------------------------------------------------------------------------|
| Page 2    | <b>Online-Supplemental Methods</b>                                                                                                                                                                                                                                                            |
| Page 3    | <b>STable 1:</b> Overall characteristics of participants who were excluded or included in the present study                                                                                                                                                                                   |
| Page 4    | <b>STable 2:</b> Example of food items in the 17 food groups                                                                                                                                                                                                                                  |
| Page 5    | <b>STable 3:</b> Nutrient intake according to quartile (Q) categories of healthful plant-based diet index                                                                                                                                                                                     |
| Pages 6-7 | <b>STable 4:</b> Single nucleotide polymorphisms (SNPs) included in a genetic risk score of BMI                                                                                                                                                                                               |
| Page 8    | <b>STable 5:</b> Effect of 10-unit increment of genetic risk score (GRS) for differences in body mass index and mean arterial blood pressure according to quartile (Q) categories of healthful plant-based diet index                                                                         |
| Page 9    | <b>STable 6:</b> Effect of 10-unit increment of a genetic risk score (GRS) for differences in lipid markers according to quartile (Q) categories of healthful plant-based diet index                                                                                                          |
| Page 10   | <b>STable 7:</b> Effect of 10-unit increment of a genetic risk score for differences in body mass index and mean arterial blood pressure according to quartile (Q) categories of healthful plant-based diet index in the subpopulation*                                                       |
| Page 11   | <b>STable 8:</b> Odds ratio (OR) for untreated high blood pressure per 10-unit increment in healthful plant-based diet index stratified by quartiles of genetic risk score (GRS) in the subpopulation*                                                                                        |
| Page 12   | <b>STable 9:</b> Hazard ratios (HRs) for CVD or MI according to 10-unit increment of the healthful plant-based diet index among individuals with high genetic risk score (GRS) or low GRS in the subpopulation*                                                                               |
| Page 13   | <b>SFigure 1:</b> Distribution of the healthful plant-based diet index (hPDI)                                                                                                                                                                                                                 |
| Page 14   | <b>SFigure 2:</b> Distribution of genetic risk score (GRS) of body mass index (BMI)                                                                                                                                                                                                           |
| Page 15   | <b>SFigure 3:</b> Odds ratios (ORs) for obesity (panel A) and untreated high blood pressure (BP) (panel B) by genetic risk score (GRS) of BMI                                                                                                                                                 |
| Page 16   | <b>SFigure 4:</b> Odds ratios (ORs) for obesity (panel A) and untreated high blood pressure (BP) (panel B) by healthful plant-based diet index scores                                                                                                                                         |
| Page 17   | <b>SFigure 5:</b> Hazard ratios (HRs) for CVD (A) or MI (B) according to high- or low-genetic risk score (GRS) and tertile (T) categories of the healthful plant-based diet index (hPDI) or per 10-unit increment in hPDI among participants with obesity or high blood pressure at baseline. |

## Online-Supplemental Methods

### *Dietary Assessment*

The Oxford WebQ asked about consumption of >200 types of foods and >30 types of drinks during the previous 24 hours using standard categories to indicate the amount consumed. As compared with an interviewer-administrated dietary assessment, the Oxford WebQ captures similar food items and estimates similar nutrient intakes with moderate-to-strong correlations for the majority of nutrients (Spearman's correlation coefficients ranges of 0.5–0.9).<sup>1</sup> Study participants also answered the following question: "Would you say that what you ate and drank yesterday was fairly typical for you? (yes/no)"; we recognized that 81% (n=99014/121799) of the participants answered "yes" to the question. A previous study reported stable levels of food intakes over 4 years after a baseline assessment in this cohort<sup>2</sup>; we also confirmed that there was a strong correlation (Pearson correlation coefficient=0.88;  $P < 0.0001$ ) between a "hPDI assessed at baseline" and an "averaged hPDI" based on repeated measurements during 2009-2012 (maximum: five times, n of participants=121799). Therefore, the present study used the earliest data on dietary intake to maximize a follow-up time if participants had completed the dietary assessment more than once.

### *Covariates*

Participants completed a touch screen questionnaire which asked to report income (less than £18,000, £18,000 to £30,999, £31,000 to £51,999, £52,000 to £100,000, or greater than £100,000), education, smoking habit (never, former, current), lifestyle habits (such as hours of TV watching and sleeping), the number of days and minutes per day spent walking, performing a moderate activity and vigorous activity at least 10 minutes at a time. According to the Guidelines for Data Processing and Analysis of the International Physical Activity Questionnaire (IPAQ),<sup>3</sup> we calculated minutes performing moderate or vigorous physical activity per week. The Townsend Social Deprivation Index was created by the UK Biobank group<sup>4</sup>, a composite measure of deprivation based on unemployment, non-car ownership, non-home ownership, and household overcrowding. A negative value of the Townsend Social Deprivation Index represents high socio-economic status. The multivariate-adjusted model 1 included covariates of age, sex, top 5 principal components of ancestry; model 2 included additional variables of multivitamin supplement use, college education, smoking habit (never, former, current), energy intake (quintiles), alcohol intake (0, 0-<5, 5-<15, or  $\geq 15$  g/d), TV watching hours (0-<1, 1-3,  $\geq 3$  hours/d), physical activity (quintiles), sleeping hours (<7, 7-9,  $\geq 9$  hours/d), and the Townsend Social Deprivation Index (quintiles). We used missing indicators if there were missing data on the covariates.

## References

1. Liu B, Young H, Crowe FL *et al.* Development and evaluation of the Oxford WebQ, a low-cost, web-based method for assessment of previous 24 h dietary intakes in large-scale prospective studies. *Public Health Nutr* 2011; **14**: 1998-2005.
2. Bradbury KE, Young HJ, Guo W, Key TJ. Dietary assessment in UK Biobank: an evaluation of the performance of the touchscreen dietary questionnaire. *J Nutr Sci* 2018; **7**: e6.
3. Guidelines for data processing and analysis of the International Physical Activity Questionnaire (IPAQ).2005. URL: <<http://www.IPAQ.ki.se>.
4. Adams J, Ryan V, White M. How accurate are Townsend Deprivation Scores as predictors of self-reported health? A comparison with individual level data. *J Public Health (Oxf)* 2005; **27**: 101-6.

**STable 1:** Overall characteristics of participants who were excluded (n=89,210) or included (n=121,799) in the present study

| Characteristics                             | Excluded (n=89,210) |             | Included (n=121,799) |             |       |             |       |             |
|---------------------------------------------|---------------------|-------------|----------------------|-------------|-------|-------------|-------|-------------|
|                                             | Total               |             | Total                |             | Women |             | Men   |             |
|                                             | N                   | Data        | N                    | Data        | N     | Data        | N     | Data        |
| Age, y                                      | 89210               | 57.4 (7.8)  | 121799               | 55.1 (7.9)  | 69909 | 54.8 (7.8)  | 51890 | 55.5 (8.1)  |
| Male sex                                    | 89210               | 48.1%       | 121799               | 42.6%       | -     | -           | -     | -           |
| Current smoking, yes                        | 88870               | 8.0%        | 121573               | 7.8%        | 69909 | 6.7%        | 51890 | 9.2%        |
| Townsend deprivation index                  | 88945               | -1.2 (3)    | 121799               | -1.8 (2.7)  | 69909 | -1.8 (2.7)  | 51890 | -1.8 (2.7)  |
| College or university degree, yes           | 89210               | 40.9%       | 121799               | 43.7%       | 69909 | 41.7%       | 51890 | 46.50%      |
| Physical activity, MET-hours/wk             | 84252               | 38.7 (39.6) | 116268               | 40.2 (39.4) | 66091 | 38.9 (37.4) | 50177 | 41.9 (41.9) |
| Hours of TV-watching, hours per day         | 88621               | 2.7 (1.6)   | 121448               | 2.4 (1.5)   | 69670 | 2.4 (1.4)   | 51778 | 2.4 (1.5)   |
| Healthful plant-based diet index            | 83381               | 56 (7)      | 121799               | 56 (7)      | 69909 | 57 (7)      | 51890 | 55 (7)      |
| Genetic risk score of body mass index (BMI) | 84710               | 70.8 (5.7)  | 121799               | 70.9 (5.6)  | 69909 | 70.9 (5.7)  | 51890 | 70.9 (5.6)  |
| BMI, kg/m <sup>2</sup>                      | 88543               | 28 (5)      | 121799               | 26.2 (4.1)  | 69909 | 25.8 (4.4)  | 51890 | 26.7 (3.6)  |
| Systolic blood pressure, mmHg               | 84579               | 141 (19)    | 121799               | 133 (17)    | 69909 | 131 (17)    | 51890 | 137 (16)    |
| Diastolic blood pressure, mmHg              | 84584               | 84 (10)     | 121799               | 80 (10)     | 69909 | 79 (9)      | 51890 | 82 (9)      |
| Mean arterial blood pressure, mmHg          | 84579               | 102 (12)    | 121799               | 98 (11)     | 69909 | 96 (11)     | 51890 | 100 (11)    |
| Triglycerides, mmol/L                       | 83001               | 1.78 (1.03) | 115996               | 1.62 (0.94) | 66565 | 1.41 (0.76) | 49431 | 1.89 (1.09) |
| Total cholesterol, mmol/L                   | 83064               | 5.50 (1.17) | 116068               | 5.85 (1.06) | 66600 | 5.94 (1.08) | 49468 | 5.74 (1.03) |
| HDL cholesterol, mmol/L                     | 75963               | 1.42 (0.38) | 105951               | 1.51 (0.38) | 60316 | 1.65 (0.37) | 45635 | 1.33 (0.3)  |
| LDL cholesterol, mmol/L                     | 82921               | 3.42 (0.88) | 115845               | 3.66 (0.82) | 66479 | 3.65 (0.84) | 49366 | 3.67 (0.79) |
| Glucose, mmol/L                             | 75905               | 5.30 (1.48) | 105869               | 4.96 (0.75) | 60275 | 4.95 (0.68) | 45594 | 4.98 (0.82) |
| HbA1c-IFCC, mmol/mol                        | 81764               | 37 (8)      | 115869               | 35 (4)      | 66496 | 35 (4)      | 49373 | 35 (4)      |

N, number of participants with available data. Data are mean (SD) or %.

**STable 2:** Example of food items in the 17 food groups

| Food groups                              | Food items                                                                                                                                                                                                                                                                                                                                                                | Scoring  |
|------------------------------------------|---------------------------------------------------------------------------------------------------------------------------------------------------------------------------------------------------------------------------------------------------------------------------------------------------------------------------------------------------------------------------|----------|
| Whole grains                             | Porridge, muesli, oat crunch, bran cereal, cereal bar, non-white bread (flour types, brown, wholemeal, other type), seeded or other bread, crispbread, whole-wheat cereal, other cereal, whole meal pasta, brown rice, couscous, other cooked grains (such as bulgur).                                                                                                    | Positive |
| Fruits                                   | Mixed fruit, apple, banana, berries, cherries, grapefruit, grapes, mango, melon, orange, orange-like small fruits, peach/nectarine, pear, pineapple, plum, other fruits, stewed/cooked fruit, prunes, other dried fruit                                                                                                                                                   | Positive |
| Vegetables                               | Mixed vegetables, vegetable pieces, coleslaw, side salad, beetroot, broccoli, butternut squash, cabbage/kale, carrots, cauliflower, celery, courgette, cucumber, garlic, leeks, lettuce, mushrooms, onion, parsnip, sweet peppers, spinach, sprouts, sweetcorn, sweet potato, fresh tomatoes, cooked or tinned tomatoes, turnip/swede, watercress, other vegetable intake | Positive |
| Nuts                                     | Salted peanuts, unsalted peanuts, salted nuts, unsalted nuts, seeds                                                                                                                                                                                                                                                                                                       | Positive |
| Legumes, Vegetarian protein alternatives | Beans (baked beans), other beans or lentils, broad beans, green beans, peas, soy or vegetable milk, vegetarian sausages/burgers, tofu, quorn, other vegetarian alternative                                                                                                                                                                                                | Positive |
| Tea and coffee                           | Instant coffee, filtered coffee, cappuccino, latte, espresso, other coffee drinks, standard tea, rooibos tea, green tea, herbal tea, other tea                                                                                                                                                                                                                            | Positive |
| Refined grains                           | Sweetened cereal, plain cereal, white bread, naan bread, garlic bread, white pasta, white rice, pancake, scotch pancake, croissant, scone, savoury or cheesy biscuits, other savoury snack, snackpot                                                                                                                                                                      | Reverse  |
| Potatoes                                 | Fried potatoes, boiled/baked potatoes, mashed potatoes, crisps (e.g., potato chips)                                                                                                                                                                                                                                                                                       | Reverse  |
| Sugary drinks                            | Low calorie or diet drinks (e.g. fizzy, squash), carbonated (fizzy) drinks, squash or cordial                                                                                                                                                                                                                                                                             | Reverse  |
| Fruit juices                             | Orange juice, grapefruit juice, other fruit/vegetable juice, fruit smoothie                                                                                                                                                                                                                                                                                               | Reverse  |
| Sweets and desserts                      | Double crust pie, single crust pie/flan, crumble topping, Yorkshire pudding, Danish pastry, fruitcake, cake, doughnuts, sponge pudding, other dessert, chocolate bar, white chocolate, milk chocolate, dark chocolate, chocolate-covered raisin, chocolate sweet, diet sweets, chocolate-covered biscuits, chocolate biscuits, sweet biscuits, other sweets               | Reverse  |
| Animal fat                               | Butter on bread/crackers (spreadable, low fat, normal fat, or unknown type), dairy spread on bread/crackers (very low fat, low fat, normal fat, unknown type)                                                                                                                                                                                                             | Reverse  |
| Dairy                                    | Milk, dairy smoothie, flavored milk, yogurt, ice-cream, low fat hard cheese, hard cheese, soft cheese, blue cheese, low fat cheese spread, cheese spread, cottage cheese, feta cheese, mozzarella cheese, goat's cheese, other cheese, cheesecake, milk-based pudding, other milk-based pudding                                                                           | Reverse  |
| Eggs                                     | Whole eggs, omelettes or scrambled egg, eggs in sandwiches, scotch egg, other egg dishes                                                                                                                                                                                                                                                                                  | Reverse  |
| Fish or seafood                          | Tinned tuna, oily fish, breaded fish, battered fish, white fish, prawns, lobster/crab, shellfish, other fish intake                                                                                                                                                                                                                                                       | Reverse  |
| Meat                                     | Sausage, beef, pork, lamb, crumbed or deep-fried poultry, poultry, bacon, ham, liver, other meat intake                                                                                                                                                                                                                                                                   | Reverse  |
| Miscellaneous animal-based foods         | Pizza, Indian snacks                                                                                                                                                                                                                                                                                                                                                      | Reverse  |

**STable 3:** Nutrient intake according to quartile (Q) categories of healthful plant-based diet index (hPDI)

|                                  | Q1          | Q2          | Q3          | Q4          |
|----------------------------------|-------------|-------------|-------------|-------------|
| N                                | 30550       | 32123       | 26255       | 32871       |
| Healthful plant-based diet index | 47 (3)      | 54 (1)      | 58 (1)      | 65 (3)      |
| <b>Food intake, servings/day</b> |             |             |             |             |
| Whole grains                     | 1.9 (2.2)   | 2.6 (2.3)   | 3.1 (2.4)   | 3.6 (2.5)   |
| Fruits                           | 1.4 (1.5)   | 2 (1.7)     | 2.4 (1.8)   | 3.2 (2)     |
| Vegetables                       | 1.7 (1.9)   | 2.3 (2.3)   | 2.7 (2.4)   | 3.6 (2.8)   |
| Nuts                             | 0.1 (0.3)   | 0.1 (0.4)   | 0.2 (0.4)   | 0.3 (0.6)   |
| Legumes                          | 0.2 (0.5)   | 0.3 (0.6)   | 0.4 (0.7)   | 0.7 (0.8)   |
| Tea and coffee                   | 3.9 (1.9)   | 4.4 (1.8)   | 4.7 (1.8)   | 5.1 (1.8)   |
| Fruit juices                     | 0.6 (0.7)   | 0.5 (0.7)   | 0.4 (0.6)   | 0.3 (0.6)   |
| Refined grains                   | 1.9 (1.6)   | 1.2 (1.4)   | 0.8 (1.1)   | 0.5 (0.9)   |
| Potatoes                         | 0.9 (0.8)   | 0.8 (0.7)   | 0.7 (0.7)   | 0.5 (0.6)   |
| Sugar sweetened beverages        | 0.9 (1.2)   | 0.5 (1)     | 0.3 (0.8)   | 0.2 (0.6)   |
| Sweets and desserts              | 2.8 (2.2)   | 2.3 (2)     | 1.9 (1.8)   | 1.4 (1.6)   |
| Animal fat                       | 1.2 (1.5)   | 0.8 (1.3)   | 0.6 (1.2)   | 0.3 (1)     |
| Dairy                            | 1.2 (1)     | 1.1 (1)     | 1 (1)       | 1 (1)       |
| Egg                              | 0.4 (0.7)   | 0.3 (0.6)   | 0.2 (0.5)   | 0.1 (0.5)   |
| Fish or seafood                  | 0.4 (0.6)   | 0.3 (0.6)   | 0.3 (0.6)   | 0.3 (0.5)   |
| Meat                             | 1.5 (1.3)   | 1.2 (1.1)   | 1 (1)       | 0.8 (0.9)   |
| Miscellaneous animal-based foods | 0.2 (0.7)   | 0.1 (0.5)   | 0.1 (0.4)   | 0 (0.3)     |
| <b>Daily nutrient intake</b>     |             |             |             |             |
| Total energy (E) intake, kcal/d  | 2293 (623)  | 2097 (596)  | 1997 (582)  | 1923 (565)  |
| Total protein, %E                | 15.4 (4)    | 15.9 (4.1)  | 16.2 (4.2)  | 16.3 (4.2)  |
| Total fat, %E                    | 34.8 (7.2)  | 33 (7.6)    | 32 (7.8)    | 30.9 (8.2)  |
| Total carbohydrate, %E           | 46.8 (8.8)  | 48 (9.2)    | 49 (9.4)    | 50.5 (9.7)  |
| Total sugar, g                   | 124 (52)    | 119 (51)    | 117 (49)    | 118 (48)    |
| Polyunsaturated fatty acids, %E  | 6 (2.6)     | 5.9 (2.6)   | 5.9 (2.7)   | 6.2 (2.9)   |
| Dietary fiber, g                 | 13.6 (5.8)  | 15.4 (6.5)  | 16.8 (6.8)  | 19.8 (7.5)  |
| Beta Carotene, ug                | 2299 (2338) | 2817 (2707) | 3258 (2980) | 4135 (3485) |
| Folate, ug                       | 293 (115)   | 297 (119)   | 302 (121)   | 322 (127)   |
| Vitamin C, mg                    | 144 (110)   | 147 (114)   | 152 (117)   | 166 (120)   |
| Vitamin E, mg                    | 8.8 (4.3)   | 8.8 (4.5)   | 9 (4.6)     | 10 (5)      |

Data are mean (SD).

**STable 4:** Single nucleotide polymorphisms (SNPs) included in a genetic risk score of BMI

| Gene               | Chr. | Published SNP | Effect allele | Other allele | $\beta$ | SE    |
|--------------------|------|---------------|---------------|--------------|---------|-------|
| <i>SEC16B</i>      | 1    | rs543874      | G             | A            | 0.048   | 0.004 |
| <i>NEGR1</i>       | 1    | rs3101336     | C             | T            | 0.033   | 0.003 |
| <i>FPGT-TNNI3K</i> | 1    | rs12566985    | G             | A            | 0.024   | 0.003 |
| <i>PTBP2</i>       | 1    | rs11165643    | T             | C            | 0.022   | 0.003 |
| <i>FUBP1</i>       | 1    | rs12401738    | A             | G            | 0.021   | 0.003 |
| <i>NAV1</i>        | 1    | rs2820292     | C             | A            | 0.020   | 0.003 |
| <i>AGBL4</i>       | 1    | rs657452      | A             | G            | 0.023   | 0.003 |
| <i>ELAVL4</i>      | 1    | rs11583200    | C             | T            | 0.018   | 0.003 |
| <i>TMEM18</i>      | 2    | rs13021737    | G             | A            | 0.060   | 0.004 |
| <i>ADCY3</i>       | 2    | rs10182181    | G             | A            | 0.031   | 0.003 |
| <i>LINC01122</i>   | 2    | rs1016287     | T             | C            | 0.023   | 0.003 |
| <i>EHBP1</i>       | 2    | rs11688816    | G             | A            | 0.017   | 0.003 |
| <i>ERBB4</i>       | 2    | rs7599312     | G             | A            | 0.022   | 0.003 |
| <i>UBE2E3</i>      | 2    | rs1528435     | T             | C            | 0.018   | 0.003 |
| <i>LRP1B</i>       | 2    | rs2121279     | T             | C            | 0.025   | 0.004 |
| <i>KCNK3</i>       | 2    | rs11126666    | A             | G            | 0.021   | 0.003 |
| <i>ETV5</i>        | 3    | rs1516725     | C             | T            | 0.045   | 0.005 |
| <i>RASA2</i>       | 3    | rs16851483    | T             | G            | 0.048   | 0.008 |
| <i>CADM2</i>       | 3    | rs13078960    | G             | T            | 0.030   | 0.004 |
| <i>FHIT</i>        | 3    | rs2365389     | C             | T            | 0.020   | 0.003 |
| <i>RARB</i>        | 3    | rs6804842     | G             | A            | 0.019   | 0.003 |
| <i>GBE1</i>        | 3    | rs3849570     | A             | C            | 0.019   | 0.003 |
| <i>GNPDA2</i>      | 4    | rs10938397    | G             | A            | 0.040   | 0.003 |
| <i>SCARB2</i>      | 4    | rs17001654    | G             | C            | 0.031   | 0.005 |
| <i>SLC39A8</i>     | 4    | rs13107325    | T             | C            | 0.048   | 0.007 |
| <i>HHIP</i>        | 4    | rs11727676    | T             | C            | 0.036   | 0.006 |
| <i>POC5</i>        | 5    | rs2112347     | T             | G            | 0.026   | 0.003 |
| <i>TFAP2B</i>      | 6    | rs2207139     | G             | A            | 0.045   | 0.004 |
| <i>PARK2</i>       | 6    | rs13191362    | A             | G            | 0.028   | 0.005 |
| <i>C6orf106</i>    | 6    | rs205262      | G             | A            | 0.022   | 0.004 |
| <i>TDRG1</i>       | 6    | rs2033529     | G             | A            | 0.019   | 0.003 |
| <i>FOXO3</i>       | 6    | rs9400239     | C             | T            | 0.019   | 0.003 |
| <i>PMS2L11</i>     | 7    | rs2245368     | C             | T            | 0.032   | 0.006 |
| <i>HIP1</i>        | 7    | rs1167827     | G             | A            | 0.020   | 0.003 |
| <i>HNF4G</i>       | 8    | rs17405819    | T             | C            | 0.022   | 0.003 |
| <i>RALYL</i>       | 8    | rs2033732     | C             | T            | 0.019   | 0.004 |
| <i>LINGO2</i>      | 9    | rs10968576    | G             | A            | 0.025   | 0.003 |
| <i>LMX1B</i>       | 9    | rs10733682    | A             | G            | 0.017   | 0.003 |
| <i>TLR4</i>        | 9    | rs1928295     | T             | C            | 0.019   | 0.003 |
| <i>EPB41L4B</i>    | 9    | rs6477694     | C             | T            | 0.017   | 0.003 |
| <i>C9orf93</i>     | 9    | rs4740619     | T             | C            | 0.018   | 0.003 |
| <i>HIF1AN</i>      | 10   | rs17094222    | C             | T            | 0.025   | 0.004 |
| <i>GRID1</i>       | 10   | rs7899106     | G             | A            | 0.040   | 0.007 |
| <i>NT5C2</i>       | 10   | rs11191560    | C             | T            | 0.031   | 0.005 |

|                 |    |            |   |   |       |       |
|-----------------|----|------------|---|---|-------|-------|
| <i>TCF7L2</i>   | 10 | rs7903146  | C | T | 0.023 | 0.003 |
| <i>BDNF</i>     | 11 | rs11030104 | A | G | 0.041 | 0.004 |
| <i>MTCH2</i>    | 11 | rs3817334  | T | C | 0.026 | 0.003 |
| <i>TRIM66</i>   | 11 | rs4256980  | G | C | 0.021 | 0.003 |
| <i>CADM1</i>    | 11 | rs12286929 | G | A | 0.022 | 0.003 |
| <i>HSD17B12</i> | 11 | rs2176598  | T | C | 0.020 | 0.004 |
| <i>BCDIN3D</i>  | 12 | rs7138803  | A | G | 0.032 | 0.003 |
| <i>CLIP1</i>    | 12 | rs11057405 | G | A | 0.031 | 0.006 |
| <i>MTIF3</i>    | 13 | rs12016871 | T | C | 0.030 | 0.005 |
| <i>OLFM4</i>    | 13 | rs12429545 | A | G | 0.033 | 0.005 |
| <i>NRXN3</i>    | 14 | rs7141420  | T | C | 0.024 | 0.003 |
| <i>PRKD1</i>    | 14 | rs12885454 | C | A | 0.021 | 0.003 |
| <i>STXBP6</i>   | 14 | rs10132280 | C | A | 0.023 | 0.003 |
| <i>MAP2K5</i>   | 15 | rs16951275 | T | C | 0.031 | 0.004 |
| <i>DMXL2</i>    | 15 | rs3736485  | A | G | 0.018 | 0.003 |
| <i>FTO</i>      | 16 | rs1558902  | A | T | 0.082 | 0.003 |
| <i>GPRC5B</i>   | 16 | rs12446632 | G | A | 0.040 | 0.005 |
| <i>ATP2A1</i>   | 16 | rs3888190  | A | C | 0.031 | 0.003 |
| <i>SBK1</i>     | 16 | rs2650492  | A | G | 0.021 | 0.004 |
| <i>KAT8</i>     | 16 | rs9925964  | A | G | 0.019 | 0.003 |
| <i>NLRC3</i>    | 16 | rs758747   | T | C | 0.023 | 0.004 |
| <i>RPTOR</i>    | 17 | rs12940622 | G | A | 0.018 | 0.003 |
| <i>RABEP1</i>   | 17 | rs1000940  | G | A | 0.019 | 0.003 |
| <i>MC4R</i>     | 18 | rs6567160  | C | T | 0.056 | 0.004 |
| <i>C18orf8</i>  | 18 | rs1808579  | C | T | 0.017 | 0.003 |
| <i>GRP</i>      | 18 | rs7243357  | T | G | 0.022 | 0.004 |
| <i>ZC3H4</i>    | 19 | rs3810291  | A | G | 0.028 | 0.004 |
| <i>QPCTL</i>    | 19 | rs2287019  | C | T | 0.036 | 0.004 |
| <i>KCTD15</i>   | 19 | rs29941    | G | A | 0.018 | 0.003 |
| <i>PGPEP1</i>   | 19 | rs17724992 | A | G | 0.019 | 0.004 |
| <i>TOMM40</i>   | 19 | rs2075650  | A | G | 0.026 | 0.005 |

Single nucleotide polymorphisms (SNPs) that showed genome-wide significant associations ( $P < 5 \times 10^{-8}$ ) for BMI in a study by Locke AE, Kahali B, Berndt SI *et al.* Genetic studies of body mass index yield new insights for obesity biology. *Nature* 2015; **518**: 197-206.

**STable 5:** Effect of 10-unit increment of genetic risk score (GRS) for differences in body mass index and mean arterial blood pressure according to quartile (Q) categories of healthful plant-based diet index

| Outcomes                     | Healthful plant-based diet index |             |             |             | <i>P</i> <sub>interaction</sub> |
|------------------------------|----------------------------------|-------------|-------------|-------------|---------------------------------|
|                              | Q1                               | Q2          | Q3          | Q4          |                                 |
| Body mass index              |                                  |             |             |             |                                 |
| Model 1                      | 1.07 (0.04)                      | 0.92 (0.04) | 0.89 (0.04) | 0.69 (0.04) | <0.0001                         |
| Model 2                      | 1.05 (0.04)                      | 0.89 (0.04) | 0.86 (0.04) | 0.65 (0.04) | <0.0001                         |
| Mean arterial blood pressure |                                  |             |             |             |                                 |
| Model 1                      | 0.48 (0.11)                      | 0.31 (0.11) | 0.28 (0.12) | 0.15 (0.1)  | 0.033                           |
| Model 2                      | 0.47 (0.11)                      | 0.27 (0.11) | 0.27 (0.12) | 0.12 (0.1)  | 0.021                           |

Data are  $\beta$  (SE) per 10-unit increment of GRS for the outcomes. Model 1: age, sex, and the top five principal components of ancestry

Model 2: model 1 + college education history, the Townsend deprivation index, smoking habit, total energy intake, multivitamin supplement use, alcohol intake, physical activity, sleep duration, and TV watching hours.



**STable 6:** Effect of 10-unit increment of a genetic risk score (GRS) for differences in lipid markers according to quartile (Q) categories of healthful plant-based diet index

| <i>Participants</i>                                                | N      | Healthful plant-based diet index |                |                |                | <i>P</i> interaction |
|--------------------------------------------------------------------|--------|----------------------------------|----------------|----------------|----------------|----------------------|
|                                                                    |        | Q1                               | Q2             | Q3             | Q4             |                      |
| <i>Outcomes</i>                                                    |        |                                  |                |                |                |                      |
| <b><i>Total participants</i></b>                                   |        |                                  |                |                |                |                      |
| Log-transformed triglycerides                                      | 115996 | 0.023 (0.005)                    | 0.011 (0.005)  | 0.013 (0.005)  | 0.002 (0.005)  | 0.002                |
| HDL cholesterol                                                    | 105951 | -0.019 (0.003)                   | -0.021 (0.003) | -0.014 (0.004) | -0.006 (0.004) | 0.012                |
| <b><i>Participants without a history of known dyslipidemia</i></b> |        |                                  |                |                |                |                      |
| Log-transformed triglycerides                                      | 108939 | 0.024 (0.005)                    | 0.013 (0.005)  | 0.014 (0.005)  | 0.003 (0.005)  | 0.006                |
| HDL cholesterol                                                    | 99434  | -0.019 (0.004)                   | -0.021 (0.004) | -0.016 (0.004) | -0.008 (0.004) | 0.037                |

N, number of participants with available data on each outcome measurement.

Data  $\beta$  (SE) per 10-unit increment of GRS after adjusted for age, sex, and the top 5 principal components of ancestry, college education history, smoking habit, total energy intake, multivitamin supplement use, alcohol intake, physical activity, sleeping hours, TV-watching hours per day, and the Townsend deprivation index, and a history of known dyslipidemia (i.e., self-reported history of dyslipidemia or cholesterol-lowering medication use, if the analysis was performed in total participants).

**STable 7:** Effect of 10-unit increment of a genetic risk score for differences in body mass index and mean arterial blood pressure according to quartile (Q) categories of healthful plant-based diet index in the subpopulation\*

| Outcomes                     | Healthful plant-based diet index |             |             |             | <i>P</i> interaction |
|------------------------------|----------------------------------|-------------|-------------|-------------|----------------------|
|                              | Q1                               | Q2          | Q3          | Q4          |                      |
| Body mass index              |                                  |             |             |             |                      |
| Model 1                      | 1.10 (0.05)                      | 0.93 (0.05) | 0.90 (0.05) | 0.68 (0.04) | <.0001               |
| Model 2                      | 1.07 (0.05)                      | 0.91 (0.04) | 0.87 (0.05) | 0.64 (0.04) | <.0001               |
| Mean arterial blood pressure |                                  |             |             |             |                      |
| Model 1                      | 0.61 (0.13)                      | 0.33 (0.12) | 0.18 (0.13) | 0.14 (0.11) | 0.006                |
| Model 2                      | 0.60 (0.12)                      | 0.31 (0.12) | 0.17 (0.13) | 0.11 (0.11) | 0.004                |

Model 1: age, sex, and the top 5 principal components of ancestry

Model 2: model 1 + multivitamin supplement use, college education history, smoking habit, total energy intake, alcohol intake, physical activity, sleeping hours, TV watching hours, and the Townsend deprivation index.

\*In the subpopulation of participants after excluding those who reported their dietary intake yesterday was not a typical intake.

**STable 8:** Odds ratio (OR) for untreated high blood pressure per 10-unit increment in healthful plant-based diet index (hPDI) stratified by quartiles of genetic risk score (GRS) in the subpopulation\*

| Stratification   | OR (95% CI) per<br>10 unit of hPDI | P interaction |
|------------------|------------------------------------|---------------|
| Quartiles of GRS |                                    |               |
| Q1               | 0.96 (0.92, 1.00)                  |               |
| Q2               | 0.92 (0.88, 0.96)                  | 0.0002        |
| Q3               | 0.91 (0.87, 0.95)                  |               |
| Q4               | 0.87 (0.84, 0.91)                  |               |

Solid lines are estimates; dotted lines are 95% CIs. Data and 95% CIs after adjusted for covariates of Figure 1. \*In the subpopulation of participants after excluding those who reported their dietary intake yesterday was not a typical intake.

**STable 9:** Hazard ratios (HRs) for CVD or MI according to 10-unit increment of the healthful plant-based diet index among individuals with high genetic risk score (GRS) or low GRS in the subpopulation\*

| Outcomes             | High-GRS group    | Low-GRS group     |
|----------------------|-------------------|-------------------|
| CVD                  |                   |                   |
| HR (95% CI)          | 0.78 (0.67, 0.90) | 0.96 (0.84, 1.11) |
| <i>P</i> interaction | 0.045             |                   |
| MI                   |                   |                   |
| HR (95% CI)          | 0.69 (0.57, 0.84) | 0.95 (0.79, 1.13) |
| <i>P</i> interaction | 0.011             |                   |

Data and 95% CIs after adjusted for covariates in Figure 1.

\*In the subpopulation of participants after excluding those who reported their dietary intake yesterday was not a typical intake.

**SFigure 1:** Distribution of the healthful plant-based diet index (hPDI)

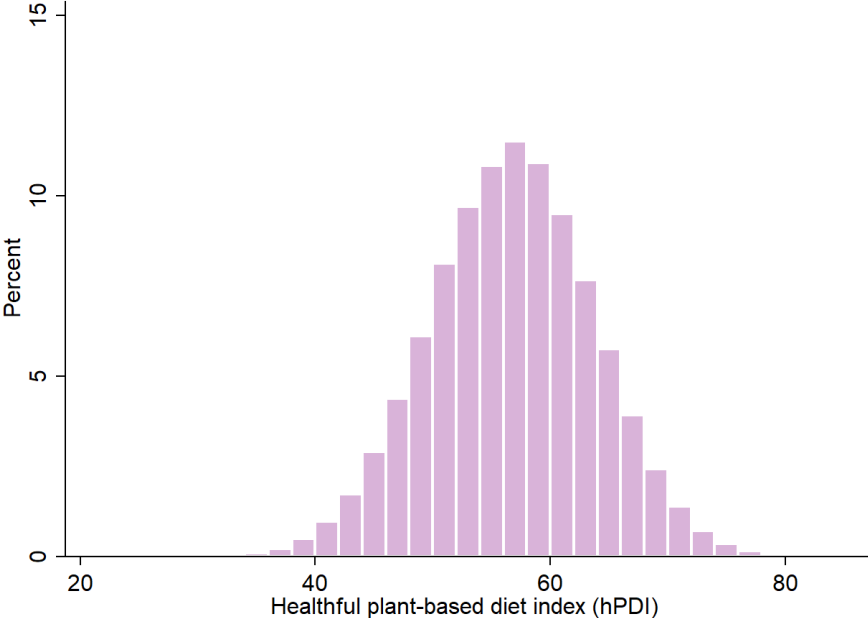

**SFigure 2:** Distribution of genetic risk score (GRS) of body mass index (BMI)

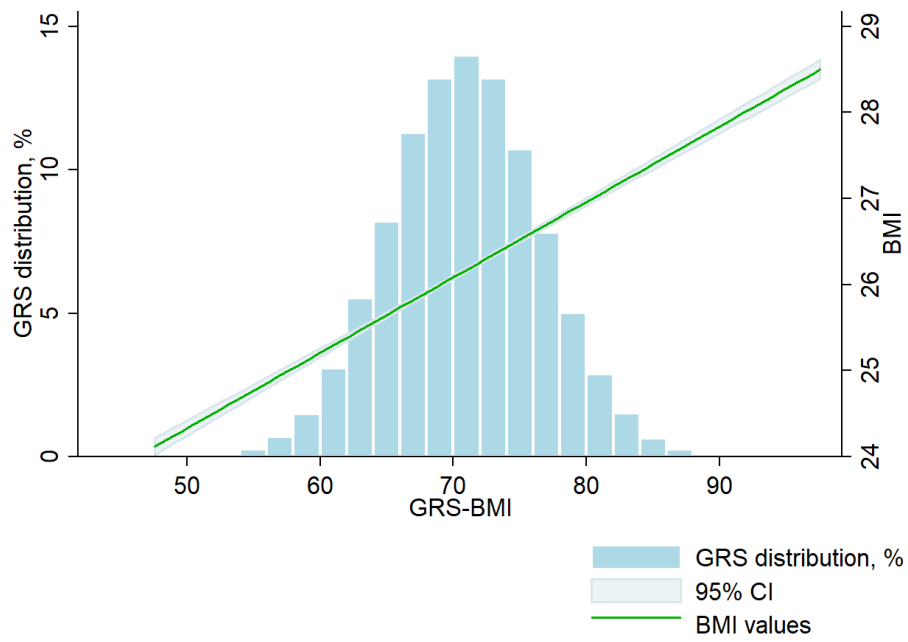

Dotted green lines are 95% CIs for BMI values.

**SFigure 3:** Odds ratios (ORs) for obesity (panel A) and untreated high blood pressure (BP) (panel B) by genetic risk score (GRS) of BMI

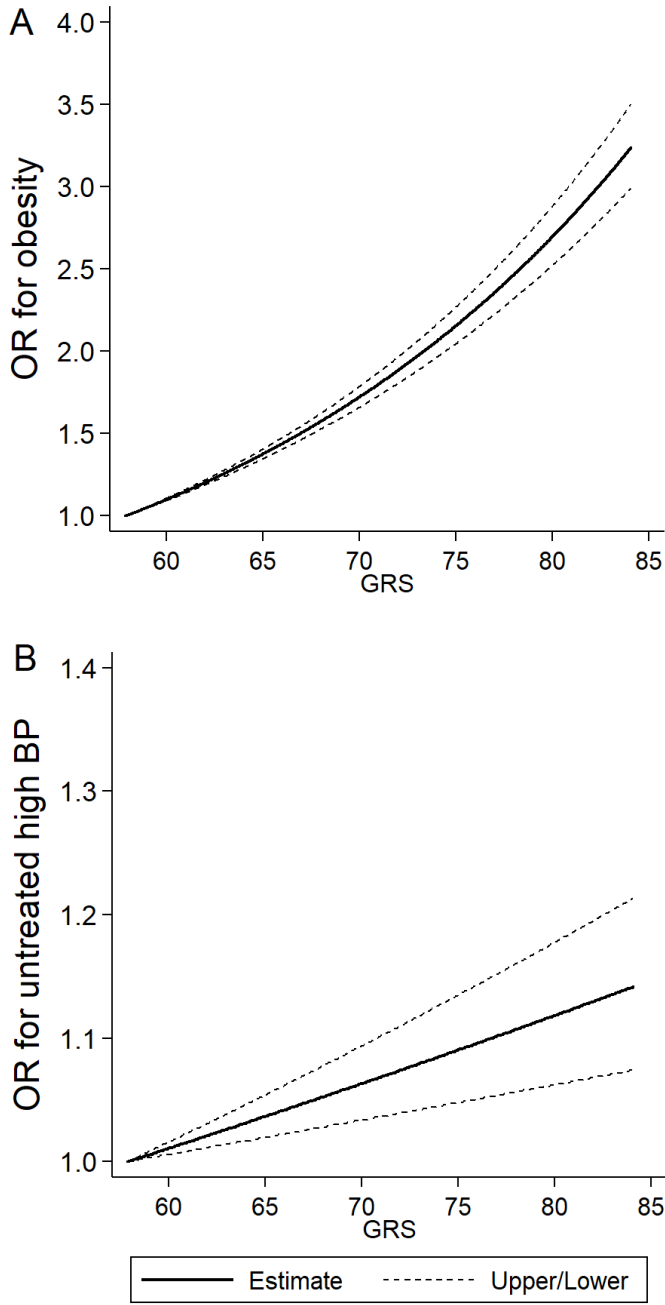

Solid lines are estimates; dotted lines are 95% CIs.  
Data after adjusted for age, sex, and the top 5 principal components of ancestry.

**SFigure 4:** Odds ratios (ORs) for obesity (panel A) and untreated high blood pressure (BP) (panel B) by healthful plant-based diet index scores

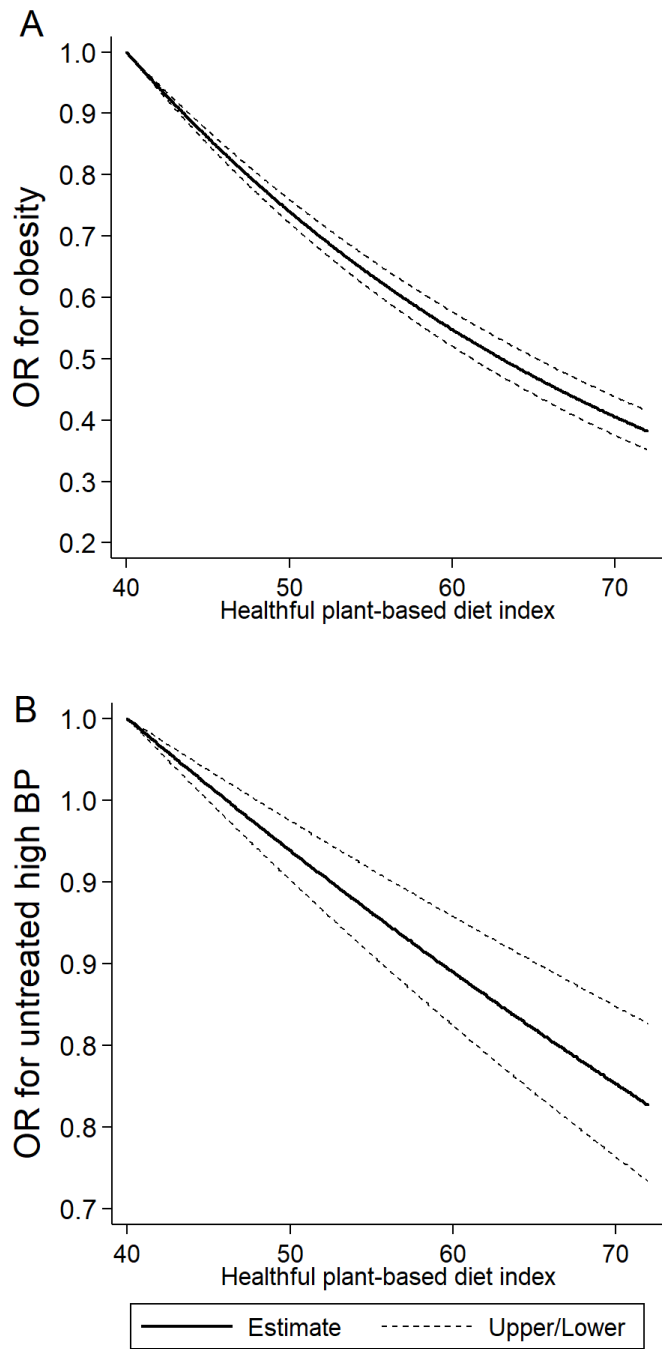

Solid lines are estimates; dotted lines are 95% CIs. Data after adjusted for covariates of Figure 1.



**SFigure 5:** Hazard ratios (HRs) for CVD (A) or MI (B) according to high- or low-genetic risk score (GRS) and tertile (T) categories of the healthful plant-based diet index (hPDI) or per 10-unit increment in hPDI among participants with obesity or high blood pressure at baseline.

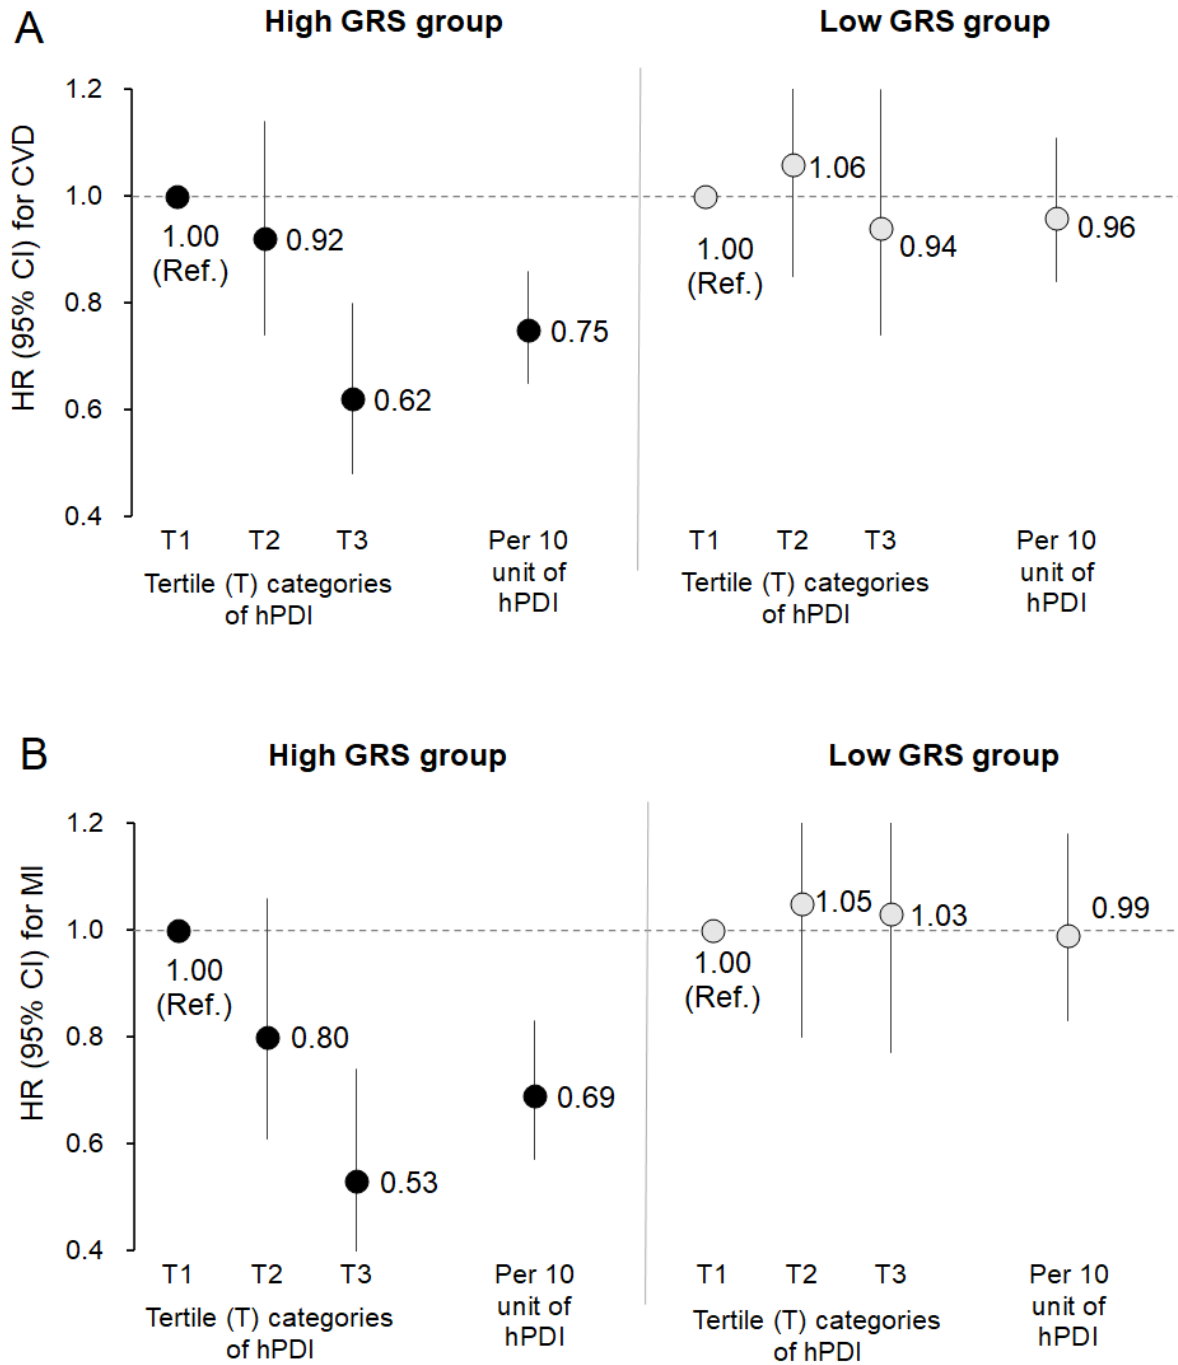

Data and 95% CIs after adjusted for covariates of Figure 1.
